# Supplementary material for: Tandem C–C coupling – intramolecular acetylenic Schmidt reaction under Pd/C–Cu catalysis
Source: Royal Society of Chemistry journal article supplement (doi:10.1039/b617823e), 2007-01-01
Supplement: b617823e.pdf [file b617823e.pdf]

## Tandem C-C Coupling - Intramolecular Acetylenic Schmidt Reaction under Pd/C-Cu Catalysis

Venkateswara Rao Batchu,<sup>a</sup> Deepak Kumar Barange,<sup>a</sup> Dinesh Kumar,<sup>a</sup> Bukkapattanam R. Sreekanth,<sup>a</sup> K. Vyas,<sup>a</sup> E. Amarender Reddy,<sup>b</sup> Manojit Pal<sup>a,\*</sup>

<sup>a</sup>*Chemistry-Discovery Research*, <sup>b</sup>*Custom Pharmaceutical Services, Dr. Reddy's Laboratories Ltd., Bollaram Road, Miyapur, Hyderabad 500050, India*  
[manojitpal@drreddys.com](mailto:manojitpal@drreddys.com)

Table of contents

**Page 2; General methods**

**Page 2; Preparation of 2-iodo benzoyl azide (1a)**

**Page 3; Preparation of 2-Iodo-3-methoxy-benzoyl azide (1b)**

**Page 3; Preparation of 3-substituted 2*H*-isoquinoline-1-ones (3)**

**Page 12; X-ray crystal structure of 3j**

**Page 13; In vitro anticancer activity**

**Experimental Section**

**General methods:** Unless stated otherwise, reactions were performed under nitrogen atmosphere. Reactions were monitored by thin layer chromatography (TLC) on silica gel plates (60 F254), visualizing with ultraviolet light or iodine spray. Flash chromatography was performed on silica gel (60-120 mesh) using distilled petroleum ether and ethyl acetate.  $^1\text{H}$  NMR and  $^{13}\text{C}$  NMR spectra were determined in  $\text{CDCl}_3$  solution on 200 & 400 and 50 MHz spectrometers, respectively. Proton chemical shifts ( $\delta$ ) are relative to tetramethylsilane (TMS,  $\delta = 0.00$ ) as internal standard and expressed in ppm. Spin multiplicities are given as s (singlet), d (doublet), t (triplet) and m (multiplet) as well as b (broad). Coupling constants ( $J$ ) are given in hertz. Infrared spectra were recorded on a FT-IR spectrometer. Melting points were determined by using melting point apparatus and are uncorrected. Thermal analysis data [Differential Scanning Calorimetry (DSC)] was generated with the help of DSC-50 detector. MS spectra were obtained on a mass spectrometer. Chromatographic purity by HPLC was determined by using area normalization method and the condition specified in each case: column, mobile phase (range used), flow rate, detection wavelength, and retention time. All the terminal alkynes used are commercially available.

**CAUTION!** Azido-containing compounds are presumed to be potentially explosive and therefore proper safety precautions should be taken before using these compounds. However, we did not encounter with any problems while using benzoyl azides in our laboratory.

**Preparation of 2-iodo benzoyl azide<sup>1</sup> (1a):**

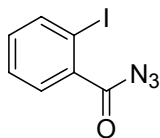

To a mixture of 2-iodobenzoic acid (5.0 g, 20.16 mmol) and sodium azide (1.13 g, 20.16 mmol) in dry DMF (40 mL) was added  $\text{POCl}_3$  (6 mL, 38.70 mmol) at 0 °C. The reaction mixture was stirred at room temperature for 3 h. After completion of the reaction crushed ice (300 gm) was added to the reaction mixture. The white solid separated was filtered and dried under vacuum to afford the desired compound (3.6 g, 65% yield); mp 130-132 °C;  $^1\text{H}$  NMR ( $\text{CDCl}_3$ , 200 MHz)  $\delta$  8.08-7.98 (m, 1H), 7.45 (t,  $J = 7.7$  Hz, 1H), 7.25-7.15 (m, 2H); IR ( $\text{cm}^{-1}$ , KBr) 1691, 1582, 1561, 1467, 1429, 1404;  $m/z$  (ES Mass), 274 (M+1,

100 %); HPLC 98.5 %; Symmetry Shield RP 18 (150 x 4.6 mm), mobile phase A: 0.01M  $\text{KH}_2\text{PO}_4$  (pH = 3.0), mobile phase B: acetonitrile, gradient (T/% B) 0/25, 3/25, 18/70, 23/70, 24/25, 25/25, flow rate 1.0 mL/min, UV 210 nm, retention time 10.6 min.

### Preparation of 2-Iodo-3-methoxy-benzoyl azide (1b):

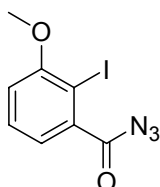

To the stirred solution of 2-iodo-3-methoxy benzoic acid (3.5 g, 12.58 mmol) and sodium azide (0.90 gm, 13.84 mmol) in dry DMF (20 mL) was added  $\text{POCl}_3$  (3.9 g, 4 mL, 25.49 mmol) at 0 °C. The reaction mixture was stirred at room temperature for 3 h. After completion of the reaction crushed ice (200 gm) was added to the reaction mixture. The white solid separated was filtered and dried under vacuum to afford the desired compound (2.18 g, 74 % yield); mp 102-103 °C;  $^1\text{H}$  NMR ( $\text{CDCl}_3$ , 200 MHz)  $\delta$  7.45-7.35 (m, 2H), 7.01-6.97 (m, 1H), 3.93 (s, 3H, OMe); IR ( $\text{cm}^{-1}$ , KBr) 1692, 1268, 1054;  $m/z$  (ES Mass), 304 (M+1, 100 %), HPLC 97.7 %; Inertsil ODS 3V (150 x 4.6) mm, mobile phase A: 0.01M  $\text{KH}_2\text{PO}_4$  (pH = 3.0 with  $\text{H}_3\text{PO}_4$ ), mobile phase B: acetonitrile, gradient (T/% B) 0/30, 4/30, 16/80, 22/80, 24/30, 26/30, flow rate 1.0 mL/min, UV 210 nm, retention time 8.6 min.

### Preparation of 3-substituted 2H-isoquinoline-1-ones (3):

**Typical procedure:** A mixture of 2-iodo benzoyl azide (0.3 g, 1.09 mmol), 10 % Pd/C (0.034 g, 0.033 mmol),  $\text{PPh}_3$  (0.034 g, 0.13 mmol), CuI (0.013 g, 0.065 mmol) and triethylamine (0.22 g, 0.3 mL, 2.17 mmol) in ethanol (10 mL) was stirred at 25 °C for 30 min under nitrogen. To this mixture was added 2-methyl but-3-yn-2-ol (0.092 g, 1.09 mmol) slowly with stirring. The reaction mixture was then stirred at 80 °C for 12h. After completion of the reaction the mixture was cooled to room temperature, diluted with EtOAc (50 mL) and filtered through celite. The filtrate was collected and concentrated under vacuum. The residue was purified by column chromatography (petroleum ether-EtOAc) to afford the desired product.

**3-(1-Hydroxy-1-methyl-ethyl)-2H-isoquinolin-1-one (3a):**

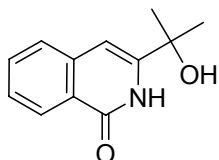

Brown solid; mp 88-90 °C;  $^1\text{H}$  NMR ( $\text{CDCl}_3$ , 400 MHz)  $\delta$  8.27 (d,  $J = 7.5$  Hz, 1H), 7.70 (t,  $J = 7.5$  Hz, 1H), 7.47 (t,  $J = 6.8$  Hz, 1H), 7.43 (d,  $J = 6.8$  Hz, 1H), 6.62 (s, 1H), 1.91 (bs, OH), 1.60 (s, 6H); IR ( $\text{cm}^{-1}$ , KBr) 3284, 1736;  $m/z$  (CI Mass) 205 ( $\text{M}+1$ , 100%), 187 ( $\text{M}^+-18$ , 30%);  $^{13}\text{C}$  NMR ( $\text{CDCl}_3$ , 50 MHz)  $\delta$  161.7, 137.2, 134.9, 131.9, 129.5, 128.1, 126.4, 125.9, 99.9, 83.9, 28.2 (2C); HPLC 99.0%, Inertsil ODS 3V (150 x 4.6) mm, mobile phase A: 0.01M  $\text{KH}_2\text{PO}_4$ , mobile phase B:  $\text{CH}_3\text{CN}$ , gradient (T/% B): 0/30, 2/30, 12/80, 22/80, 23/30, 24/30, flow rate 1.0 mL/min, UV 230 nm, retention time 7.0 min. Elemental analysis found C, 70.74; H, 6.42; N, 6.94;  $\text{C}_{12}\text{H}_{13}\text{NO}_2$  requires C, 70.92; H, 6.45; N, 6.89.

**3-(3-Hydroxypropyl)-2H-isoquinolin-1-one (3b):**

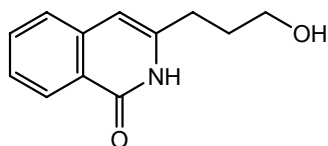

White solid; mp 66-68 °C;  $^1\text{H}$  NMR ( $\text{CDCl}_3$ , 400 MHz)  $\delta$  8.26 (d,  $J = 8.0$  Hz, 1H), 7.68 (t,  $J = 7.8$  Hz, 1H), 7.46 (t,  $J = 8.0$  Hz, 1H), 7.36 (d,  $J = 7.8$  Hz, 1H), 6.30 (s, 1H), 3.74 (t,  $J = 6.1$  Hz, 2H), 2.66 (t,  $J = 7.5$  Hz, 2H), 2.02-1.95 (m, 2H), 1.57 (bs, -OH); IR ( $\text{cm}^{-1}$ , KBr) 3285, 1739;  $m/z$  (CI Mass) 205 ( $\text{M}+1$ , 100%);  $^{13}\text{C}$  NMR ( $\text{CDCl}_3$ , 50 MHz)  $\delta$  162.9, 137.4, 134.7, 129.4 (2C), 127.6 (2C), 124.9, 103.3, 61.5, 29.8 (2C); HPLC 95.7%, Inertsil ODS 3V (150 x 4.6) mm, mobile phase A: 0.01M  $\text{KH}_2\text{PO}_4$ , mobile phase B:  $\text{CH}_3\text{CN}$ , gradient (T/% B) 0/30, 3/30, 12/80, 18/80, 20/30, 22/30, flow rate 1.5 mL/min, UV 210 nm, retention time 5.0 min; Elemental analysis found C, 71.09; H, 6.46; N, 7.00;  $\text{C}_{12}\text{H}_{13}\text{NO}_2$  requires C, 70.92; H, 6.45; N, 6.89.

**3-(2-Hydroxy-propyl)-2H-isoquinolin-1-one (3c):**

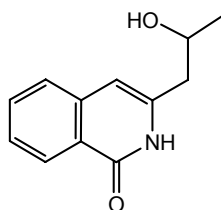

Light brown semi solid;  $^1\text{H}$  NMR ( $\text{CDCl}_3$ , 400 MHz)  $\delta$  8.25 (d,  $J = 8.0$  Hz, 1H), 7.68 (t,  $J = 7.5$  Hz, 1H), 7.49 (t,  $J = 7.5$  Hz, 1H), 7.37 (d,  $J = 8.0$  Hz, 1H), 6.36 (s, 1H), 4.00-3.96 (m, 2H), 2.68-2.60 (m, 1H), 1.31 (d,  $J = 8.2$  Hz, 3H); IR ( $\text{cm}^{-1}$ , neat) 3388, 1715;  $m/z$  (CI Mass) 205 ( $\text{M}+1$ , 100%);  $^{13}\text{C}$  NMR ( $\text{CDCl}_3$ , 50 MHz)  $\delta$  164.3, 137.3, 134.8, 129.5, 128.4, 127.9 (2C), 125.2, 105.1, 65.6, 43.1, 23.1; HPLC 96.17%, Inertsil ODS 3V (4.6 x 250) mm, mobile phase A: 0.01M  $\text{KH}_2\text{PO}_4$ , mobile phase B:  $\text{CH}_3\text{CN}$ , gradient (T/% B) 0/30, 4/30, 13/65, 16/80, 26/80, 30/30, flow rate 1.0 mL/min, UV 230 nm, retention time 7.6 min; Elemental analysis found C, 71.56; H, 6.40; N, 6.75;  $\text{C}_{12}\text{H}_{13}\text{NO}_2$  requires C, 70.92; H, 6.45; N, 6.89.

**3-(2-Hydroxy-ethyl)-2H-isoquinolin-1-one (3d):**

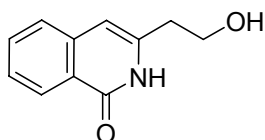

Brown solid; mp 50-52  $^{\circ}\text{C}$ ;  $^1\text{H}$  NMR ( $\text{CDCl}_3$ , 400 MHz)  $\delta$  8.25 (d,  $J = 8.0$  Hz, 1H), 8.10 (d,  $J = 7.5$  Hz, 1H), 7.69 (t,  $J = 8.0$  Hz, 1H), 7.47 (t,  $J = 7.5$  Hz, 1H), 6.30 (s, 1H), 3.75 (t,  $J = 6.2$  Hz, 2H), 2.54 (t,  $J = 6.2$  Hz, 2H); IR ( $\text{cm}^{-1}$ , KBr) 3383, 1715;  $m/z$  (CI Mass) 190 ( $\text{M}^+$ , 100%);  $^{13}\text{C}$  NMR ( $\text{CDCl}_3$ , 50 MHz)  $\delta$  163.0, 137.3, 134.8 (2C), 129.4, 127.8 (2C), 125.1, 104.8, 59.5, 36.8; HPLC 98.6%, Inertsil ODS 3V (150 x 4.6) mm, mobile phase A: 0.01M  $\text{KH}_2\text{PO}_4$ , mobile phase B:  $\text{CH}_3\text{CN}$ , gradient (T/% B) 0/25, 5/25, 15/80, 22/80, 23/25, 24/25, flow rate 1.0 mL/min, UV 230 nm, retention time 7.9 min; Elemental analysis found C, 69.59; H, 5.83; N, 7.49;  $\text{C}_{11}\text{H}_{11}\text{NO}_2$  requires C, 69.83; H, 5.86; N, 7.40.

**3-(4-hydroxy-butyl)-2H-isoquinolin-1-one (3e):**

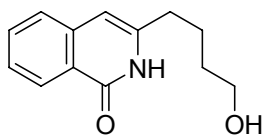

Colorless semi solid;  $^1\text{H}$  NMR ( $\text{CDCl}_3$ , 400 MHz)  $\delta$  8.25 (d,  $J = 7.8$  Hz, 1H), 7.68 (t,  $J = 7.0$  Hz, 1H), 7.45 (t,  $J = 7.0$  Hz, 1H), 7.35 (d,  $J = 7.8$  Hz, 1H), 6.27 (s, 1H), 3.70 (t,  $J = 6.4$  Hz, 2H), 2.58 (t,  $J = 7.0$  Hz, 2H), 1.83-1.80 (m, 2H), 1.79-1.70 (m, 2H), 1.63 (bs,  $\text{D}_2\text{O}$  exchangeable, 1H); IR ( $\text{cm}^{-1}$ , neat) 3408, 1727;  $m/z$  (CI Mass) 219 ( $\text{M}+1$ , 100%);  $^{13}\text{C}$  NMR ( $\text{CDCl}_3$ , 50 MHz)  $\delta$  163.0, 137.5, 134.7, 129.5 (2C), 127.6 (2C), 125.0, 103.1, 62.4, 33.2, 29.7, 23.2; HPLC 96.28%, Inertsil ODS 3V (150 x 4.6) mm, mobile phase A: 0.01M  $\text{KH}_2\text{PO}_4$ , mobile phase B:  $\text{CH}_3\text{CN}$ ; gradient (T/% B) 0/30,2/30, 12/80, 20/80, 21/30, 22/30, flow rate 1.0 mL/min, UV 230 nm, retention time 7.6 min; Elemental analysis found C, 71.77; H, 6.98; N, 6.81;  $\text{C}_{13}\text{H}_{15}\text{NO}_2$  requires C, 71.87; H, 6.96; N, 6.45.

**3-Hexyl-2H-isoquinolin-1-one (3f):**

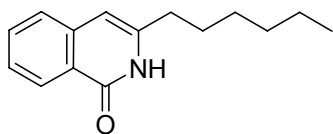

Brown semi solid;  $^1\text{H}$  NMR ( $\text{CDCl}_3$ , 400 MHz)  $\delta$  8.26 (d,  $J = 7.8$  Hz, 1H), 7.55 (t,  $J = 7.2$  Hz, 1H), 7.45 (t,  $J = 7.2$  Hz, 1H), 7.35 (d,  $J = 7.8$  Hz, 1H), 6.21 (s, 1H), 2.52 (t,  $J = 7.5$  Hz, 2H), 1.72-1.71 (m, 2H), 1.34-1.25 (m, 5H), 0.91-0.70 (m, 4H); IR ( $\text{cm}^{-1}$ , neat) 3385, 1745;  $m/z$  (CI Mass) 229 ( $\text{M}^+$ , 100%);  $^{13}\text{C}$  NMR ( $\text{CDCl}_3$ , 50 MHz)  $\delta$  163.0, 137.6, 134.6, 129.5, 128.8, 127.5 (2C), 124.9, 102.8, 33.5, 31.4, 28.6, 26.8, 22.4, 13.9; HPLC 99.81%, Inertsil ODS 3V (150 x 4.6) mm; mobile phase A: 0.01M  $\text{KH}_2\text{PO}_4$ , mobile phase B:  $\text{CH}_3\text{CN}$ , gradient (T/% B) 0/50, 2/50, 7/80, 18/80, 20/50, 22/50, flow rate 1.0 mL/min, UV 228 nm, retention time 9.9 min; Elemental analysis found C, 78.76; H, 8.32; N, 6.08;  $\text{C}_{15}\text{H}_{19}\text{NO}$  requires C, 78.56; H, 8.35; N, 6.11.

**4-(1-oxo-1,2-dihydro-isoquinolin-3-yl)-butyronitrile (3g):**

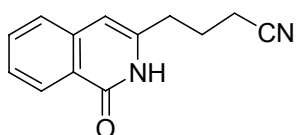

Brown solid; mp 54-56 °C;  $^1\text{H}$  NMR ( $\text{CDCl}_3$ , 400 MHz)  $\delta$  8.26 (d,  $J = 7.3$  Hz, 1H), 7.70 (t,  $J = 7.3$  Hz, 1H), 7.49 (t,  $J = 7.8$  Hz, 1H), 7.38 (d,  $J = 7.8$  Hz, 1H), 6.36 (s, 1H), 2.72 (t,  $J = 7.2$  Hz, 2H), 2.51-2.42 (m, 2H), 2.14-2.07 (m, 2H); IR ( $\text{cm}^{-1}$ , KBr) 3423, 2243, 1723;  $m/z$  (CI Mass) 214 (M+1, 100%);  $^{13}\text{C}$  NMR ( $\text{CDCl}_3$ , 50 MHz)  $\delta$  162.5, 136.9, 134.9 (2C), 129.5 (2C), 128.1, 125.3, 120.2, 104.4, 32.1, 22.6, 16.3, HPLC 98.4%, Inertsil ODS 3V (150 x 4.6) mm, mobile phase A: 0.01M  $\text{KH}_2\text{PO}_4$ , mobile phase B:  $\text{CH}_3\text{CN}$ ; gradient (T/% B) 0/30, 3/30, 12/80, 18/80, 20/30, 22/30, flow rate 1.0 mL/min, UV 210 nm, retention time 8.1 min; Elemental analysis found C, 73.67; H, 5.73; N, 13.05;  $\text{C}_{13}\text{H}_{12}\text{N}_2\text{O}$  requires C, 73.56; H, 5.70; N, 13.20.

**3-(3-chloro-propyl)-2H-isoquinolin-1-one (3h):**

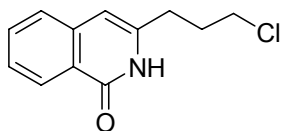

Ash colored solid; DSC 99.25 °C;  $^1\text{H}$  NMR ( $\text{CDCl}_3$ , 400 MHz)  $\delta$  8.26 (d,  $J = 7.5$  Hz, 1H), 7.68 (t,  $J = 7.5$  Hz, 1H), 7.47 (t,  $J = 7.8$  Hz, 1H), 7.37 (d,  $J = 7.8$  Hz, 1H), 6.33 (s, 1H), 3.61 (t,  $J = 6.2$  Hz, 2H), 2.73 (t,  $J = 7.3$  Hz, 2H), 2.23-2.16 (m, 2H); IR ( $\text{cm}^{-1}$ , KBr) 3423, 1723;  $m/z$  (CI Mass) 224 (M+2, 100%); HPLC 95.0%, Inertsil ODS 3V (150 x 4.6) mm; mobile phase A: 0.01M  $\text{KH}_2\text{PO}_4$ , mobile phase B:  $\text{CH}_3\text{CN}$ , gradient (T/% B) 0/45, 3/45, 12/80, 20/80, 23/45, 25/45; flow rate 1.0 mL/min, UV 210 nm, retention time 8.5 min; Elemental analysis found C, 65.21; H, 5.42; N, 6.25;  $\text{C}_{12}\text{H}_{12}\text{ClNO}$  requires C, 65.02; H, 5.46; N, 6.32.

**3-(2-Hydroxy-ethyl)-5-methoxy-2H-isoquinolin-1-one (3i):**

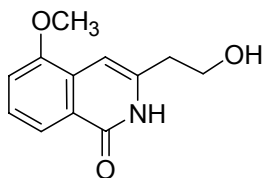

Yellow solid; mp 107-109 °C;  $^1\text{H}$  NMR ( $\text{CDCl}_3$ , 400 MHz)  $\delta$  7.85 (d,  $J = 8.0$  Hz, 1H), 7.41 (t,  $J = 8.2$  Hz, 1H), 7.15 (dd,  $J = 8.0$  & 1.0 Hz, 1H), 6.72 (s, 1H), 3.99 (t,  $J = 6.2$  Hz,

Supplementary Material (ESI) for Chemical Communications  
This journal is (c) The Royal Society of Chemistry 2007

2H), 3.92 (s, 3H), 2.80 (t,  $J = 6.2$  Hz, 2H), 1.25 (bs, -OH); IR ( $\text{cm}^{-1}$ , KBr) 3485, 1710;  $m/z$  (CI Mass) 221 ( $M+1$ , 100%);  $^{13}\text{C}$  NMR ( $\text{CDCl}_3$ , 50 MHz)  $\delta$  162.8, 153.9, 128.0, 127.8, 120.7 (2C), 114.4 (2C), 99.1, 59.7, 55.9, 37.1; HPLC 97.96%, Symmetry shield RP8 (250 x 4.6) mm; mobile phase A: 0.01M  $\text{KH}_2\text{PO}_4$ , mobile phase B:  $\text{CH}_3\text{CN}$ , gradient (T/% B): 0/25, 5/25, 17/80, 22/80, 24/25, 25/25, flow rate 1.0 mL/min, UV 235 nm, retention time 14.6 min; Elemental analysis found C, 65.54; H, 5.95; N, 6.55;  $\text{C}_{12}\text{H}_{13}\text{NO}_3$  requires C, 65.74; H, 5.98; N, 6.39.

#### 4-(5-Methoxy-1-oxo-1,2-dihydro-isoquinolin-3-yl)-butyronitrile (3j):

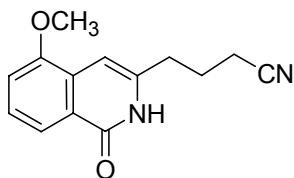

White solid; mp 70-72 °C;  $^1\text{H}$  NMR ( $\text{CDCl}_3$ , 400 MHz)  $\delta$  7.85 (d,  $J = 8.0$  Hz, 1H), 7.41 (t,  $J = 8.2$  Hz, 1H), 7.12 (dd,  $J = 8.0$  & 1.0 Hz, 1H), 6.72 (s, 1H), 3.91 (s, 3H), 2.74 (t,  $J = 7.2$  Hz, 2H), 2.45-2.40 (m, 2H), 2.00 (t,  $J = 7.0$  Hz, 2H); IR ( $\text{cm}^{-1}$ , KBr) 2930, 1722  $m/z$  (CI Mass) 243 ( $M^+$ , 100%);  $^{13}\text{C}$  NMR ( $\text{CDCl}_3$ , 50 MHz)  $\delta$  168.1, 153.7, 138.2, 131.4 (2C), 128.9 (2C), 119.6, 114.3, 93.0, 55.5, 32.4, 22.5, 16.5; HPLC 98.02%, Inertsil ODS 3V (150 x 4.6) mm, mobile phase A: 0.01M  $\text{KH}_2\text{PO}_4$ , mobile phase B:  $\text{CH}_3\text{CN}$ , gradient (T/% B) 0/30, 2/30, 12/80, 20/80, 24/30, 25/30, flow rate 1.0 mL/min, UV 228 nm, retention time 6.4 min; Elemental analysis found C, 69.49; H, 5.80; N, 11.45;  $\text{C}_{14}\text{H}_{14}\text{N}_2\text{O}_2$  requires C, 69.41; H, 5.82; N, 11.56.

#### 3-Hexyl-5-methoxy-2H-isoquinolin-1-one (3k):

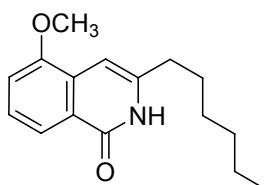



White solid; mp 78-80 °C; <sup>1</sup>H NMR (CDCl<sub>3</sub>, 400 MHz) δ 7.84 (d, *J* = 7.0 Hz, 1H), 7.37 (t, *J* = 8.0 Hz, 1H), 7.12 (d, *J* = 8.0 Hz, 1H), 6.61 (s, 1H), 3.92 (s, 3H), 2.53 (t, *J* = 8.0 Hz, 2H), 1.74-1.70 (m, 2H), 1.39-1.29 (m, 6H), 0.90 (t, *J* = 7.0 Hz, 3H); IR (cm<sup>-1</sup>, KBr) 2930, 1722; *m/z* (CI Mass) 260 (M<sup>+</sup>, 100%); <sup>13</sup>C NMR (CDCl<sub>3</sub>, 50 MHz) δ 164.2, 153.6, 137.6, 127.6 (2C), 120.8, 114.2 (2C), 97.1, 55.8, 33.7, 31.5, 28.7, 26.9, 22.5, 14.0; HPLC 98.7 %, Symmetry Shield RP 8 (150 x 4.6) 5 mm, mobile phase A 0.01M KH<sub>2</sub>PO<sub>4</sub>, mobile phase B CH<sub>3</sub>CN, gradient (T/% B) 0/50, 2/50, 8/80, 20/80, 24/50, 25/50, flow rate 1.0 mL/min, UV 210 nm, retention time 10.7 min; Elemental analysis found C, 74.29; H, 8.14; N, 5.25; C<sub>16</sub>H<sub>21</sub>NO<sub>2</sub> requires C, 74.10; H, 8.16; N, 5.40.

**3-(3-Hydroxy-propyl)-5-methoxy-2*H*-isoquinolin-1-one (3l):**

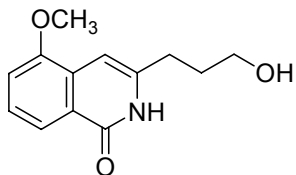

White solid; mp 82-84 °C; <sup>1</sup>H NMR (CDCl<sub>3</sub>, 400 MHz) δ 7.82 (d, *J* = 8.0 Hz, 1H), 7.38 (t, *J* = 8.1 Hz, 1H), 7.13 (d, *J* = 8.0 Hz, 1H), 6.67 (s, 1H), 3.92 (s, 3H), 3.74 (t, *J* = 6.2 Hz, 2H), 2.69 (t, *J* = 7.2 Hz, 2H), 2.01-1.95 (m, 2H), 1.25 (bs, OH); IR (cm<sup>-1</sup>, KBr) 3408, 1725; *m/z* (CI Mass) 235 (M+1, 100%); <sup>13</sup>C NMR (CDCl<sub>3</sub>, 50 MHz) δ 163.9, 156.8, 128.0, 127.8 (2C), 120.7, 114.3 (2C), 97.6, 61.5, 55.8, 29.9, 29.9; HPLC 98.46%, Inertsil ODS 3V (150 x 4.6) mm; mobile phase A: 0.01M KH<sub>2</sub>PO<sub>4</sub>; mobile phase B: ACN; gradient (T/% B): 0/30, 2/30, 12/80, 20/80, 21/30, 22/30, flow rate: 1.0 mL/min, UV 210nm, retention time 6.3 min; Elemental analysis found C, 67.09; H, 6.45; N, 5.79; C<sub>13</sub>H<sub>15</sub>NO<sub>3</sub> requires C, 66.94; H, 6.48; N, 6.00.

**3-Phenyl-2*H*-isoquinolin-1-one<sup>2a</sup> (3m):**

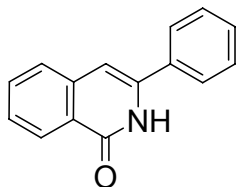

Light brown solid, mp 195 °C (lit<sup>2a</sup> 205 °C); <sup>1</sup>H NMR (CDCl<sub>3</sub>, 400 MHz) δ 8.32 (d, *J* = 8.3 Hz, 1H), 7.90-7.88 (m, 2H), 7.74-7.70 (m, 1H), 7.52-7.43 (m, 5H), 6.95 (s, 1H); IR (cm<sup>-1</sup>, KBr) 2923, 1730 *m/z* (CI Mass) 223.0 (M<sup>+</sup>, 100%); we were not able to prepare analytically pure **3m** which was always found to be contaminated with other side products.

**3-phenyl-4-phenylethynyl-2H-isoquinolin-1-one (3mm):**

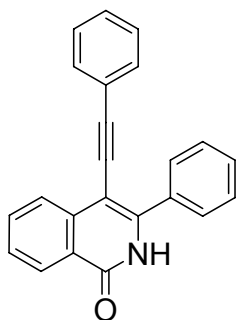

White solid; mp 144-146 °C; <sup>1</sup>H NMR (CDCl<sub>3</sub>, 400 MHz) δ 8.36 (d, *J* = 7.8 Hz, 1H), 8.24 (dd, *J* = 7.8, 1.9 Hz, 2H), 8.12 (d, *J* = 8.1 Hz, 1H), 7.88-7.84 (m, 1H), 7.59 (t, *J* = 7.5 Hz, 1H), 7.54-7.48 (m, 5H), 7.39-7.37 (m, 3H); IR (cm<sup>-1</sup>, KBr) 3057, 1745; *m/z* (CI Mass) 323 (M+1, 100%); <sup>13</sup>C (CDCl<sub>3</sub>, 50 MHz): δ 161.9, 137.0, 135.1 (2C), 132.3, 131.3 (2C), 130.4, 129.5, 128.7(2C), 128.6 (2C), 128.5 (2C), 128.1 (2C), 125.3, 122.7, 119.7, 99.7, 97.5, 82.7; HPLC 97.4%, Inertsil ODS 3V (150 x 4.6) mm, mobile phase A: 0.01M KH<sub>2</sub>PO<sub>4</sub>, mobile phase B: CH<sub>3</sub>CN, gradient (T/% B) 0/65, 2/65, 6/80, 24/80, 26/65, 28/65, flow rate 1.0 mL/min, UV 210 nm, retention time 9.9 min.

**3-p-Tolyl-2H-isoquinolin-1-one<sup>2b</sup> (3n):**

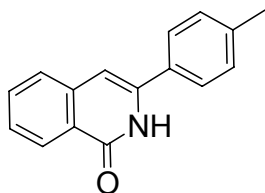

Low melting solid; <sup>1</sup>H NMR (CDCl<sub>3</sub>, 200 MHz) δ 7.94 (d, *J* = 7.52 Hz, 1H), 7.75-7.69 (m, 3H), 7.55-7.35 (m, 4H), 6.41 (s, 1H), 2.38 (s, 3H); IR (cm<sup>-1</sup>, KBr) 2925, 1737 *m/z* (CI Mass) 236.9 (M<sup>+</sup>, 100%); we were not able to prepare analytically pure **3n** which was always found to be contaminated with other side products.

**3-p-Tolyl-4-p-tolylethynyl-2H-isoquinolin-1-one (3nn):**

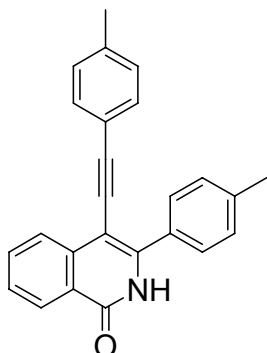

White solid; mp 128-130 °C;  $^1\text{H}$  NMR ( $\text{CDCl}_3$ , 400 MHz)  $\delta$  8.34 (d,  $J = 8.0$  Hz, 1H), 8.16 (d,  $J = 8.3$  Hz, 2H), 8.10 (d,  $J = 7.8$  Hz, 1H), 7.86-7.82 (m, 1H), 7.57 (t,  $J = 7.0$  Hz, 2H), 7.43 (d,  $J = 7.0$  Hz, 2H), 7.30 (d,  $J = 5.8$  Hz, 2H), 7.19 (d,  $J = 8.0$  Hz, 2H), 2.43 (s, 3H), 2.39 (s, 3H); IR ( $\text{cm}^{-1}$ , neat) 3455, 1739;  $m/z$  (CI Mass) 350 ( $\text{M}^+ + 1$ , 100%);  $^{13}\text{C}$  ( $\text{CDCl}_3$ , 50 MHz):  $\delta$  161.0, 140.7, 138.9, 137.2 (2C), 134.9 (2C), 130.0 (2C), 129.3 (2C), 128.5 (2C), 127.8 (2C), 125.8 (2C), 125.3 (2C), 119.5, 101.0, 97.8, 82.2, 21.5, 21.5; HPLC 95.1 %, Inertsil ODS 3V (250 x 4.6) mm, mobile phase A: 0.01M  $\text{KH}_2\text{PO}_4$ , mobile phase B: ACN, gradient (T/% B): 0/30, 2/30, 12/80, 25/80, 28/30, 30/30, flow rate: 1.0 mL/min, UV 230 nm, retention time 14.7 min.

**3-(2-Hydroxy-2-methyl-propylidene)-2,3-dihydro-isoindol-1-one (4a):**

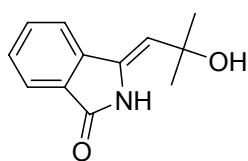

Brown solid;  $^1\text{H}$  NMR ( $\text{CDCl}_3$ , 400 MHz)  $\delta$  7.96 (d,  $J = 6.3$  Hz, 1H), 7.71 (t,  $J = 7.0$  Hz, 1H), 7.68 (d,  $J = 6.4$  Hz, 1H), 7.55 (t,  $J = 7.0$  Hz, 1H), 6.62 (s, 1H), 1.59 (s, 3H), 1.53 (s, 3H); IR ( $\text{cm}^{-1}$ , KBr) 3295, 1786;  $m/z$  (CI Mass) 187 ( $\text{M}^+ - 17$ , 100%);  $^{13}\text{C}$  NMR ( $\text{CDCl}_3$ , 50 MHz)  $\delta$  164.3, 134.5, 129.0 (2C), 128.1, 125.9, 125.4, 115.6, 109.6, 70.6, 30.5 (2C); HPLC 91.3%, Inertsil ODS 3V (250 x 4.6) mm, mobile phase A: 0.01M  $\text{KH}_2\text{PO}_4$ , mobile phase B:  $\text{CH}_3\text{CN}$ ; 0/30, 3/30, 12/80, 18/80, 20/30, 22/30, flow rate 1.0 mL/min, UV 235

nm, retention time 6.3 min; Elemental analysis found C, 70.99; H, 6.41; N, 6.79;  $C_{12}H_{13}NO_2$  requires C, 70.92; H, 6.45; N, 6.89.

### X-ray crystal structure of **3j**:

Single crystals suitable for X-ray diffraction of **3j**  $C_{14}H_{14}N_2O_2$  were obtained by dissolving the compound in methanol at room temperature. The compound **3j** crystallizes in orthorhombic crystal system (space group  $Pca2_1$ ) with unit cell parameters  $a=23.78(1)$  Å,  $b=4.560(3)$  Å,  $c=11.134(7)$  Å,  $V=1207(1)$  Å<sup>3</sup> and  $Z=4$ . The intensity data was collected on a Rigaku Mercury CCD detector with graphite monochromated Mo-K $\alpha$  radiation. The crystal structure was solved by direct methods (SIR 92) and refined by full-matrix least squares to a final R-value of 0.073 with 1401 unique reflections. The ORTEP diagram is shown in Figure 1.

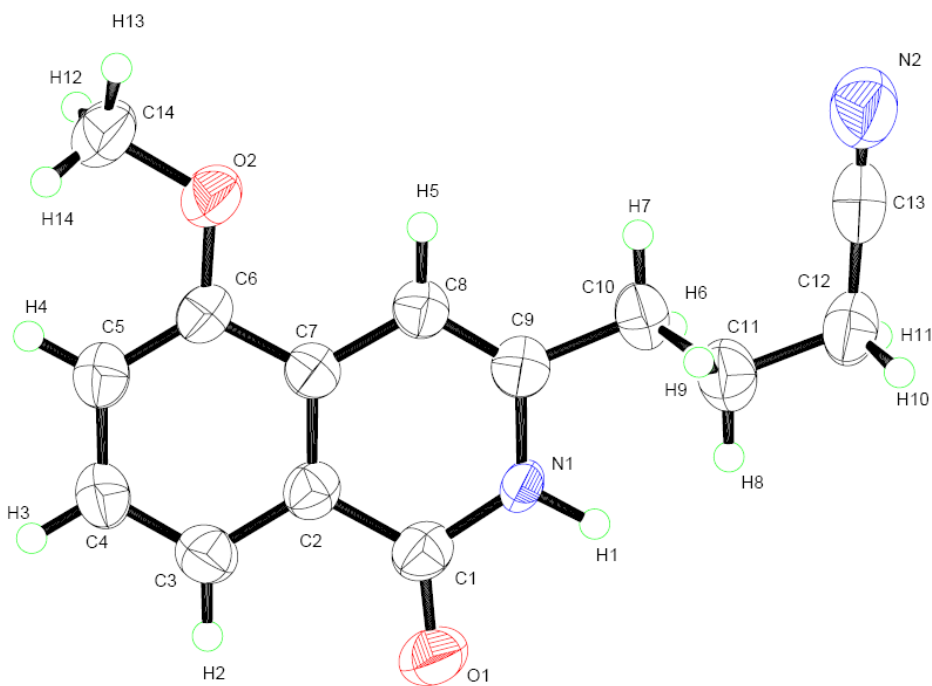

**Figure 1.** ORTEP drawn at 50 % probability displacement ellipsoids for non-hydrogen atoms.

**In vitro anticancer activity:** we evaluated some of the compounds synthesized for in vitro anticancer activity. Selected compounds were initially tested on a panel of cancer

cell lines e.g. HT-29 (colon), NCI-H460 (lung) and LoVo (colon) using the NCI standard protocol for screening anticancer molecules.<sup>3</sup> Based on promising GI<sub>50</sub> values (the concentration that causes 50% inhibition of cancer cell growth against a cell line is expressed as GI<sub>50</sub>) obtained for all these compounds we selected compound **3f** for further in vitro studies. The results are summarized in Table 1. Additionally, the respective average LC<sub>50</sub> values (LC<sub>50</sub> or Lethal Concentration 50 is the concentration of a compound that kills 50% of cells treated) are also shown in Table 1. Thus compound **3f** showed consistent anticancer activity with GI<sub>50</sub> values below 20  $\mu$ M against SW620 (colon), LoVo (colon), 786-O (renal), PC-3 (prostrate), MDA-MB-453 (breast) etc with an average LC<sub>50</sub> of 70-100. The present study thus indicates that compound **3f** could be a new and potential candidate for the development of novel anticancer agent.

**Table 1.** In vitro anti cancer activities of compound **3f**

| ENTRY | CELL PANEL   | CELL LINE  | GI 50 (mM) | LC 50 (mM) |
|-------|--------------|------------|------------|------------|
| 1.    | COLON        | HT29       | 36.86      | 100        |
| 2.    | COLON        | LoVo       | 18.4       | 70         |
| 3.    | COLON        | SW620      | 6.8        | 100        |
| 4.    | MELANOMA     | HCT116     | 24.1       | 100        |
| 5.    | LUNG         | NCI H460   | 29.7       | 100        |
| 6.    | LUNG         | A549       | 29.6       | 100        |
| 7.    | LUNG         | NCI H23    | 43.4       | 100        |
| 8.    | MELANOMA     | A431       | 100.0      | 100        |
| 9.    | RENAL        | 786-O      | 18.7       | 100        |
| 10.   | PROSTRATE    | PC-3       | 18.9       | 100        |
| 11.   | LEUKEMIA     | K562       | 52.31      | 100        |
| 12.   | LEUKEMIA     | Jurkat E6  | 60.44      | 100        |
| 13.   | BREAST       | MDA-MB-453 | 17.59      | 89         |
| 14.   | BREAST       | MCF-7      | 100.0      | 100        |
| 15.   | CNS          | U-251      | 100.0      | 100        |
| 16.   | OVARIAN      | OVCAR8     | 86.9       | 100        |
| 17.   | CERVICAL     | HELA       | 42.09      | 100        |
| 18.   | OSTEOSARCOMA | KHOS/NP    | 20.7       | 88         |

**Protocol for In Vitro Cell growth assay:** Anticancer activity of selected compounds has been tested in the cell lines as indicated above by using Sulphorhodamine B (SRB)

assay.<sup>3</sup> Cells were maintained in RPMI 1640 with 10% FBS (Fatal Bovine Serum) and Penicillin (50 µg/mL), Streptomycin (100 µg/mL). Cells were seeded in a 96-well cell culture plates at a concentration of 10000 cells per well and incubated at 37 °C in CO<sub>2</sub> incubator. Twenty-four hours later cells were treated with different concentrations (100, 10, 1, 0.1 & 0.01 µM) of compound dissolved in DMSO and incubated for 48 h. Cells were fixed by adding ice-cold 50% trichloroacetic acid (TCA) and incubating for 1 h at 4 °C. The plates were washed with distilled water, air-dried and stained with SRB solution (0.4% wt/vol in 1% acetic acid) for 30 minutes at room temperature. Unbound SRB was removed by washing thoroughly with 1% acetic acid and the plates were air-dried. The bound SRB stain was solubilized with 10 mM Tris buffer, and the optical densities were read on a spectrophotometric plate reader at 515 nm. At the time of drug addition separate reference plate for cell growth at time 0 h (the time at which drugs were added) was also terminated as described above. From the optical densities the percentage growths were calculated using the following formulae, If T is greater than or equal to T<sub>0</sub>, percentage growth = 100 x [(T-T<sub>0</sub>)/(C-T<sub>0</sub>)] and if T is less than T<sub>0</sub>, percentage growth = 100 x [(T-T<sub>0</sub>)/T<sub>0</sub>], Where T is optical density of test, C is the optical density of control and T<sub>0</sub> is the optical density at time zero. From the percentage growths a dose response curve was generated and GI<sub>50</sub> values were interpolated from the growth curves.

## References

1. (a) Leffler, J. E.; Wilson, A. F. *J. Org. Chem.* **1960**, *25*, 424. (b) Smith, P. A. S. *Org. Reactions*, Vol. III, p.387.
2. (a) Bisagni, E.; Landras, C.; Thiot, S.; Huel, C. *Tetrahedron* **1996**, *52*, 10427. (b) Lin, C.-F.; Yang, J.-H.; Hsieh, P.-C.; Lu, W.-D.; Wu, M.-J. *J. Chin. Chem. Soc. (Taipei)* **2001**, *48*, 211.
3. Monks, A.; Scudiero, D.; Skehan, P.; Shoemaker, R.; Paull, K.; Vistica, D.; Hose, C.; Langley, J.; Cronise, P.; Vaigro-Wolff, A.; Gray-Goodrich, M.; Campbell, H.; Mayo, J.; Boyd, M. *Journal of the National Cancer Institute* **1991**, *83*, 757.
